# Supplementary material for: Anti-Parkinson Effects of Holothuria leucospilota-Derived Palmitic Acid in Caenorhabditis elegans Model of Parkinson’s Disease
Source: MDPI journal article supplement (doi:10.3390/md21030141), 2023-02-23
Supplement: s1 [file s1]

Supplementary data for Manuscript entitle  
"Anti-Parkinson effects of *Holothuria leucospilota*-derived palmitic acid in  
*Caenorhabditis elegans* model of Parkinson's disease"

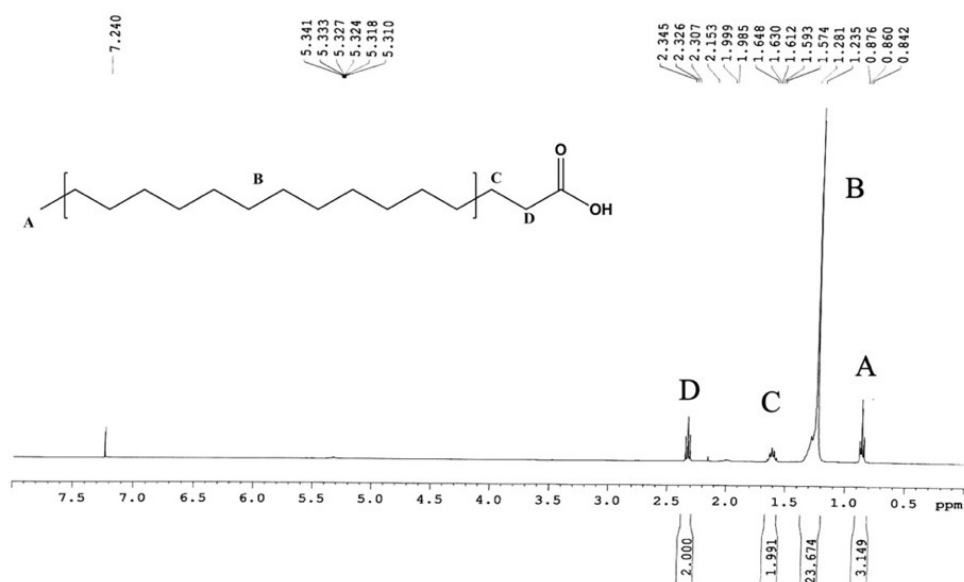

**Figure S1.**  $^1\text{H}$ -NMR spectrum of HLEA-P3, palmitic acid or hexadecanoic acid, in  $\text{CDCl}_3$ .

## Mass Spectrum SmartFormula Report

### Analysis Info

Analysis Name D:\Data\Apichart\ESI\AS-HRMS 1012 (pos).d  
 Method tune\_low.m  
 Sample Name EA3  
 Comment

Acquisition Date 7/3/2022 5:21:23 PM

Operator RU  
 Instrument micrOTOF 8213750.10411

### Acquisition Parameter

|             |            |                      |          |                  |           |
|-------------|------------|----------------------|----------|------------------|-----------|
| Source Type | ESI        | Ion Polarity         | Positive | Set Nebulizer    | 0.3 Bar   |
| Focus       | Not active |                      |          | Set Dry Heater   | 180 °C    |
| Scan Begin  | 50 m/z     | Set Capillary        | 4500 V   | Set Dry Gas      | 4.0 l/min |
| Scan End    | 2000 m/z   | Set End Plate Offset | -500 V   | Set Divert Valve | Waste     |

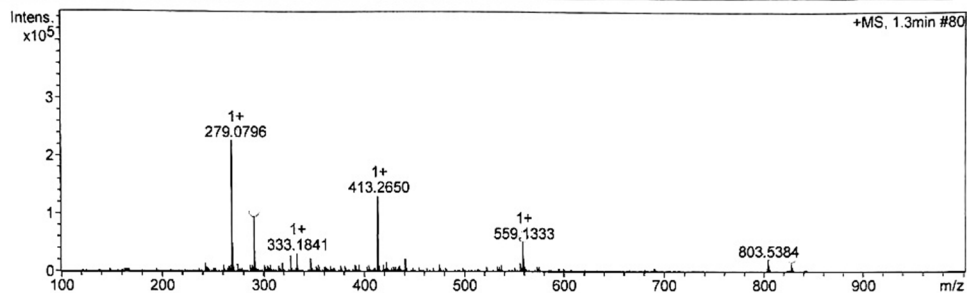

| Meas. m/z  | # | Ion Formula   | m/z        | err  [mDa] | err [ppm] | Mean err [ppm] | rdb  | N-Rule | e <sup>-</sup> Conf | mSigma |
|------------|---|---------------|------------|------------|-----------|----------------|------|--------|---------------------|--------|
| 279.079646 | 1 | C15H10N4Na    | 279.079767 | 0.1        | 0.4       | 0.1            | 12.5 | ok     | even                | 7.9    |
|            | 2 | C14H14NaO4    | 279.078430 | 1.2        | -4.5      | -4.5           | 7.5  | ok     | even                | 12.8   |
|            | 3 | C16H32NaO2    | 279.075744 | 3.9        | 14.5      | -15.2          | 8.5  | ok     | even                | 26.4   |
| 291.061360 | 1 | C16H12NaO4    | 291.062780 | 1.4        | -4.9      | -3.1           | 10.5 | ok     | even                | 13.3   |
|            | 2 | C17H8N4Na     | 291.064117 | 2.8        | 9.5       | 7.4            | 15.5 | ok     | even                | 19.9   |
|            | 3 | C12H8N6NaO2   | 291.060094 | 1.3        | -4.4      | -6.7           | 11.5 | ok     | even                | 22.6   |
| 559.133254 | 4 | C11H12N2NaO6  | 291.058757 | 2.6        | 8.9       | -11.0          | 6.5  | ok     | even                | 31.3   |
|            | 1 | C32H24NaO8    | 559.136338 | 3.1        | -5.5      | 4.0            | 20.5 | ok     | even                | 9.5    |
|            | 2 | C29H16N10NaO2 | 559.134991 | 1.7        | 3.1       | 1.2            | 26.5 | ok     | even                | 13.6   |
|            | 3 | C28H20N6NaO6  | 559.133653 | 0.4        | -0.7      | -1.0           | 21.5 | ok     | even                | 15.5   |
|            | 4 | C25H12N16Na   | 559.132305 | 0.9        | 1.7       | -3.9           | 27.5 | ok     | even                | 20.0   |
|            | 5 | C27H24N2NaO10 | 559.132316 | 0.9        | 1.7       | -3.3           | 16.5 | ok     | even                | 23.7   |
|            | 6 | C24H16N12NaO4 | 559.130968 | 2.3        | -4.1      | -6.1           | 22.5 | ok     | even                | 26.6   |
|            | 7 | C39H20NaO3    | 559.130465 | 2.8        | -5.0      | -6.5           | 29.5 | ok     | even                | 40.5   |

Figure S2. HRMS spectrum of HLEA-P3, palmitic acid, in ES, positive ion mode
